# Supplementary material
Source: publisher site journal article supplement (https://www.dovepress.com/get_supplementary_file.php?f=supplementary_file_66164.pdf)
Supplement: Supplementary file 1 [file get_supplementary_file.php]

## Supplementary Material

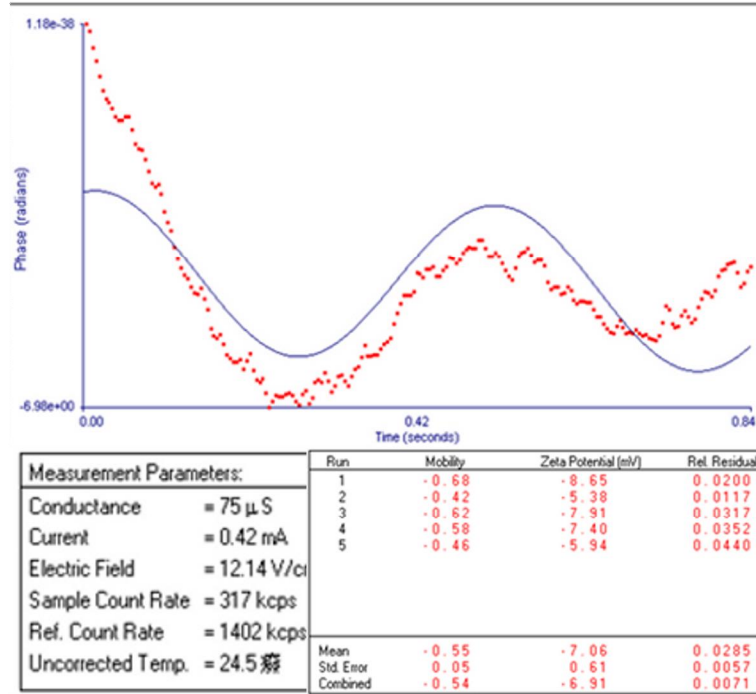

**Supplementary Figure 1:** Raw data of Zeta potential on our Gd-NPs.

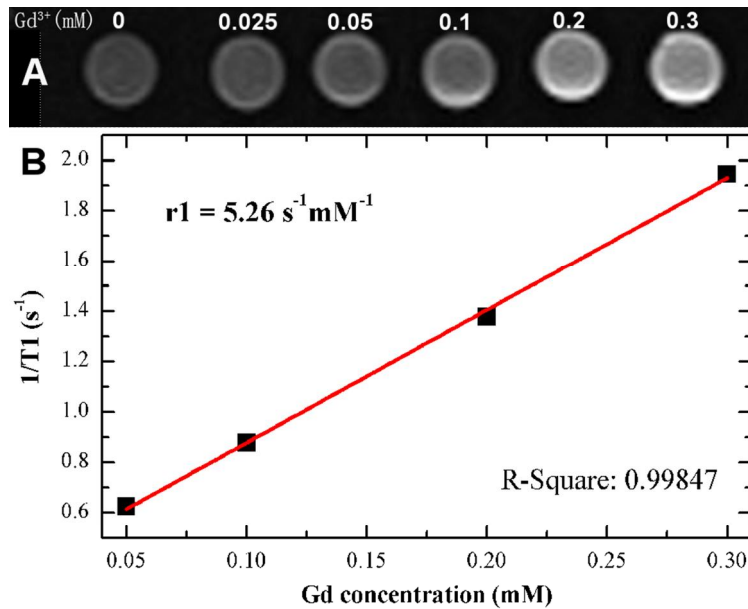

**Supplementary Figure 2:** (A)  $T_1$ -weighted phantom MR image of the Gd-NPs with concentrations of 0.3, 0.2, 0.1, 0.05, 0.025, and 0 mM at 3.0T; (B) The relaxivity ( $r_1$ ) of the Gd-NPs by nuclear magnetic relaxation dispersion (NMRD) at 3.0T.

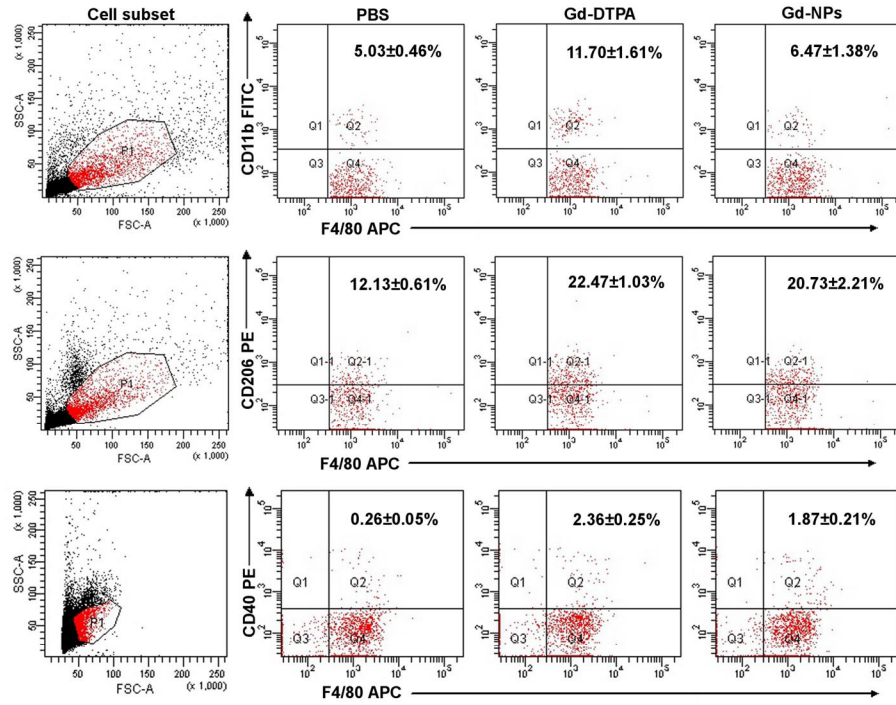

**Supplementary Figure 3:** Scatter plot of CD markers. The expression levels of CD11b, CD206 and CD40 in monocytes/macrophages of peripheral blood, respectively.

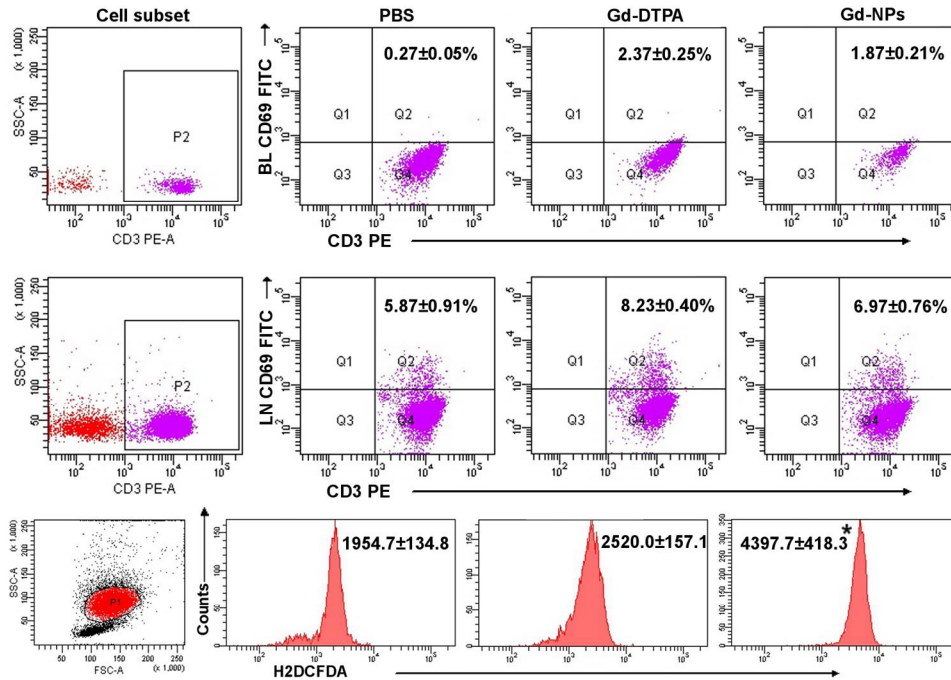

**Supplementary Figure 4:** Histogram plot of CD69 in the lymphocyte cells of peripheral blood and lymph node, and ROS of neutrophils in peripheral blood, respectively.

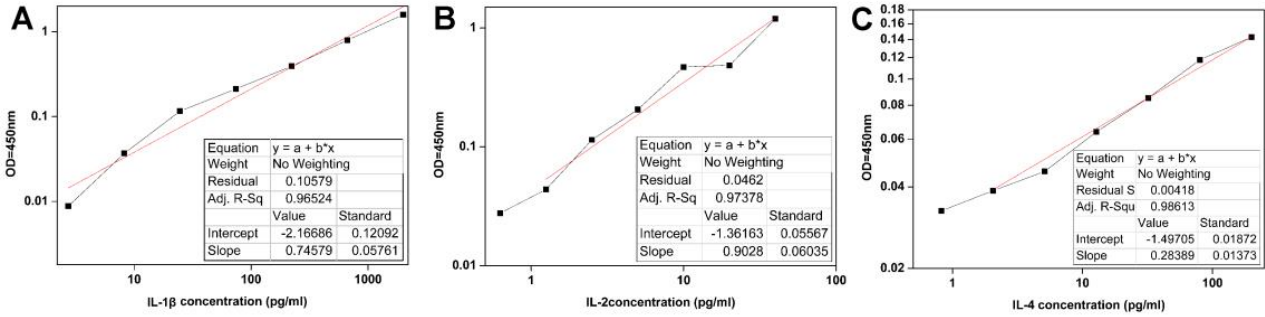

**Supplementary Figure 5: (A)-(C)** Calibration curves of IL-1 $\beta$ , IL-2 and IL-4 concentrations according to user manual (RayBiotech, Inc.), respectively.

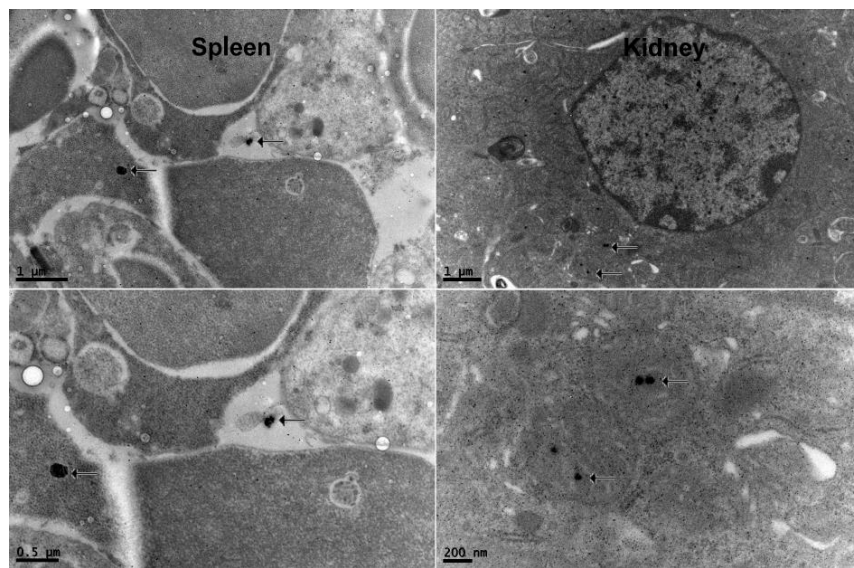

**Supplementary Figure 6:** TEM images of spleen and kidney section 4 h after intravenous administration of the Gd-NPs (15  $\mu$ mol/kg).

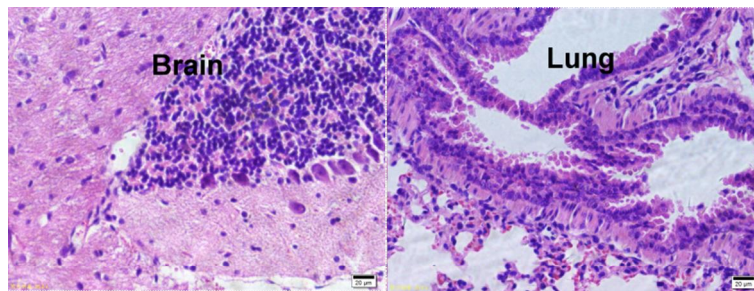

**Supplementary Figure 7:** Tissues were collected 4 h after injection of the Gd-NPs (15  $\mu$ mol/kg), stained with hematoxylin and eosin, and imaged under a light microscope at 400  $\times$  magnification.
